# Supplementary material for: Fruit bromelain ameliorates rat constipation induced by loperamide
Source: Royal Society of Chemistry journal article supplement (doi:10.1039/c7ra06109a), 2017-01-01
Supplement: c7ra06109a1.pdf [file c7ra06109a1.pdf]

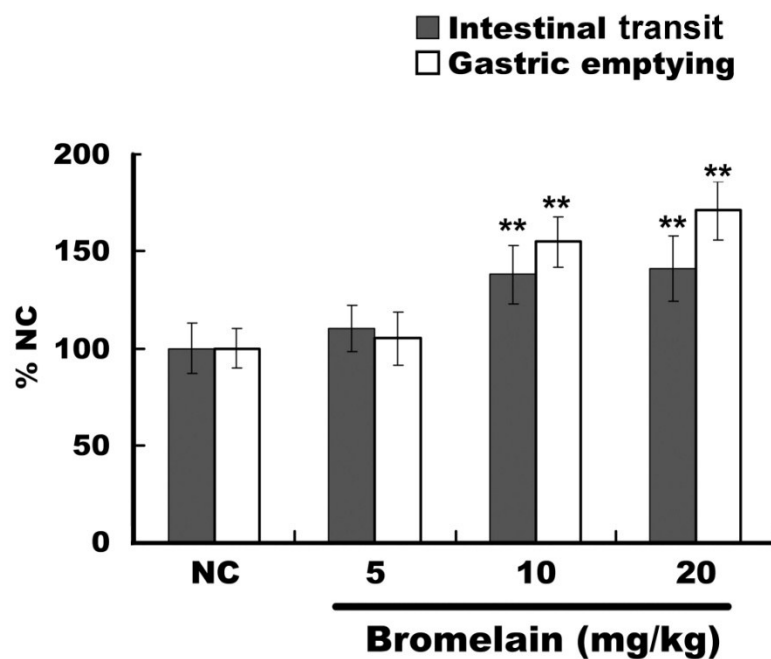

**Supplementary Figure 1 Analysis of bromelain on gastric emptying and intestinal transit in mice.** Data in normal control group are set to a relative value of 100% (normal control, NC) and expressed as the mean  $\pm$  SD. Other data are the relative values compared with NC. \*\*,  $P < 0.01$  compared with the NC,  $n=6$  mice.
